1 **Endoplasmic reticulum phospholipid scramblase activity revealed after protein reconstitution into**  
2 **giant unilamellar vesicles containing a photostable lipid reporter**

3 Patricia P. M. Mathiassen<sup>1</sup>, Anant K. Menon<sup>2\*</sup> and Thomas Günther Pomorski<sup>1,3\*</sup>

4

5 <sup>1</sup>Department of Biochemistry II – Molecular Biochemistry, Faculty of Chemistry and Biochemistry,  
6 Ruhr University Bochum, 44780, Bochum, Germany.

7 <sup>2</sup>Department of Biochemistry, Weill Cornell Medical College, 10065, New York, NY, USA.

8 <sup>3</sup>Department of Plant and Environmental Sciences, University of Copenhagen, Thorvaldsensvej 40,  
9 1871 Frederiksberg C, Denmark.

10

11 **\*Author for correspondence**

12 Anant K. Menon

13 Tel: +1-646-962-2476

14 Email address: [akm2003@med.cornell.edu](mailto:akm2003@med.cornell.edu)

15 and

16 Thomas Günther Pomorski

17 Tel: +49 2343224430

18 Email address: [Thomas.Guenther-Pomorski@ruhr-uni-bochum.de](mailto:Thomas.Guenther-Pomorski@ruhr-uni-bochum.de)

19

20

21 **Abstract**

22 Transbilayer movement of phospholipids in biological membranes is mediated by a diverse set of lipid  
23 transporters. Among them are scramblases that facilitate a rapid bi-directional movement of lipids  
24 without metabolic energy input. Here, we established a new fluorescence microscopy-based assay for  
25 detecting phospholipid scramblase activity of membrane proteins upon their reconstitution into giant  
26 unilamellar vesicles formed from proteoliposomes by electroformation. The assay is based on  
27 chemical bleaching of fluorescence of a photostable ATTO-dye labeled phospholipid with the  
28 membrane-impermeant reductant sodium dithionite. We demonstrate that this new methodology is  
29 suitable for the study of the scramblase activity of the yeast endoplasmic reticulum at single vesicle  
30 level.

31

32

33 **Keywords:** ATTO488, electroformation, endoplasmic reticulum, fluorescence microscopy, giant  
34 unilamellar vesicles, phospholipid scramblase.

35

36

## 37 Introduction

38 The lipid distribution across cellular membranes is regulated by a diverse set of membrane  
39 transporters that control the movement of lipids across membranes. These transporters can be  
40 classified into two categories: (i) ATP-driven, vectorial transporters that actively translocate lipids from  
41 one membrane leaflet to the other, often with high specificity, and (ii) ATP-independent transporters,  
42 also called scramblases that facilitate a rapid bi-directional movement of lipids without metabolic  
43 energy input. Scramblases are either constitutively active or regulated by physiological stimuli, e.g. a  
44 rise in intracellular  $\text{Ca}^{2+}$  or proteolytic cleavage<sup>1,2</sup>. Constitutively active scramblases are found in the  
45 bacterial cytoplasmic membrane and the endoplasmic reticulum (ER) and promote uniform growth of  
46 the membranes after synthesis of lipids on the cytoplasmic side. The molecular identity of specific ER  
47 scramblases is not known, but constitutive phospholipid scramblase activity is an unexpected property  
48 of Class A G protein-coupled receptors<sup>3-5</sup>. In the plasma membrane of eukaryotic cells, regulated  
49 scramblases are responsible for a controlled loss of lipid asymmetry and the appearance of the anionic  
50 phospholipid phosphatidylserine at the cell surface. Two major families of regulated scramblases have  
51 been identified: the TMEM16 family<sup>6</sup> and the Xk-related (Xkr) family<sup>7</sup>.

52 The mechanistic analysis of lipid scramblases at the molecular level is challenging due to the  
53 complexity of the membrane in which they are embedded. Current analyses are based on their  
54 reconstitution into large unilamellar liposomes (LUVs, 50–500 nm diameter) of desired bulk lipid  
55 composition followed by ensemble averaged biophysical or biochemical studies. These studies  
56 provided the first insights into the characteristics of scramblase activities. For example, the ER  
57 scrambling activity displays a relatively low specificity and transports glycerophospholipids as well as  
58 ceramide-based lipids equally well within the limited time-resolution of the activity assays<sup>8,9</sup>. The  
59 reconstitution studies show unambiguously that not all proteins can scramble lipids<sup>10,11</sup> and protein  
60 modification studies suggest that there are at least two proteins that contribute to overall scramblase  
61 activity in the ER<sup>12</sup>.

62 A significant drawback of ensemble measurements arises from the compositional heterogeneity of  
63 proteoliposome reconstitutions, which hampers quantitative analysis of vesicle properties (including  
64 stoichiometry of lipids, sterols, transmembrane proteins) and correlation with protein activity<sup>13</sup>. Giant

65 unilamellar vesicles (GUVs, 10-100  $\mu\text{m}$  diameter) are model membrane systems with dimensions  
66 comparable to that of a cell, allowing single vesicle analysis directly by microscopy techniques such as  
67 fluorescence microscopy, fluorescence correlation spectroscopy or atomic force microscopy<sup>14-17</sup>.  
68 Furthermore, such vesicles can be micro-manipulated for position control or mechanical probing.  
69 GUVs have been extensively used in membrane biophysics<sup>18,19</sup>, and in studies of cargo inclusion into  
70 the GUV lumen<sup>20,21</sup>, and incorporation of transporter proteins into the membrane<sup>22,23</sup>. Although  
71 several protocols have proven successful for studying various membrane transporters, only one assay  
72 has been established for studying scramblase activity in GUVs. This assay is based on detecting  
73 scramblase activity by observing vesicle shape changes upon addition of external lipids<sup>24</sup>. However,  
74 the approach requires tight osmotic control of buffers and stable surroundings, while additionally  
75 resulting in a low quantitative output. In this study, we established a new fluorescence microscopy-  
76 based assay for detecting phospholipid scramblase activity. The protocol allows generation and  
77 imaging of individual protein-containing GUVs and was employed to visualize the scramblase activity  
78 of ER membrane proteins. We performed reconstitution under low salt conditions that promote mild  
79 electroformation of GUVs from preformed proteoliposomes<sup>22,25</sup>. Our work sets the stage for future  
80 experiments where the critical question of the effect of membrane lipid composition on scramblase  
81 activity can be examined by generating GUVs using a combination of proteoliposomes reconstituted  
82 with purified scramblases such as members of the GPCR, TMEM16 and Xkr8 families, and LUVs of the  
83 desired composition<sup>26,27</sup>.

84

## 85 **Results**

86 **ATTO488-phosphatidylethanolamine (ATTO488-PE) is a photostable reporter of phospholipid**  
87 **scramblase activity.** Fluorescence-based phospholipid scramblase assays are typically performed  
88 using an ensemble of LUVs containing reporter lipids modified with the nitrobenzoxadiazole (NBD)  
89 fluorophore (Fig. 1a). While effective in cuvette-based applications<sup>3,12,28,29</sup>, NBD is highly susceptible  
90 to photobleaching and therefore impractical for use in the microscope. In contrast, ATTO dyes are  
91 photostable (Fig. 1b), making them an obvious choice for fluorescence microscopy applications<sup>30</sup>. We  
92 recently showed that ATTO488 can be rendered non-fluorescent by chemical reduction with the

93 membrane-impermeant dithionite, suggesting that ATTO488-modified phospholipids could  
94 be suitable reporters of scramblase activity in microscopy-based assays. We tested this possibility in a  
95 cuvette-based assay as follows: Proteoliposomes were reconstituted using egg phosphatidylcholine,  
96 trace amounts of ATTO488-PE and biotinylated phosphatidylethanolamine (biotin-PE), and Triton X-  
97 100-solubilized yeast ER membrane proteins ('Triton Extract' or TE), as described previously<sup>9,11</sup>. In  
98 these and other experiments, we generally used TE647, a preparation of TE in which the proteins had  
99 been fluorescently labeled with an amine-reactive derivative of Alexa Fluor 647 (Suppl. Fig. S1).  
100 Protein-free (empty) vesicles were prepared in parallel. We used low salt conditions as these would  
101 facilitate the conversion of proteoliposomes to GUVs in larger quantities<sup>22,25</sup>. Upon adding dithionite  
102 to symmetrically labeled vesicles lacking a scramblase, we expected to observe ~50% reduction in  
103 fluorescence, as ATTO488-PE molecules located in the outer leaflet of the vesicles are bleached  
104 whereas those in the inner leaflet are inaccessible to dithionite (Fig. 1a). However, if the vesicles  
105 contain a functional scramblase, ATTO488-PE molecules will be translocated from the inner leaflet to  
106 the external leaflet and vice versa, resulting in 100% fluorescence reduction. Our results support this  
107 scheme. We found that ATTO488-PE fluorescence was reduced by  $55 \pm 4.5\%$  (mean  $\pm$  s.d., 4 replicates)  
108 on dithionite treatment of protein-free liposomes (Fig. 1c), consistent with the expectation that the  
109 lipids are symmetrically distributed between the two leaflets. In contrast, fluorescence was reduced  
110 by  $74 \pm 4.3\%$  (3 replicates) in TE647-containing proteoliposomes (Fig. 1c). Notably, ATTO488-PE is  
111 reduced with a ~5-fold smaller half-time compared to a phospholipid with an NBD-modified acyl chain  
112 (Fig. 1d). Despite preparing proteoliposomes at a high protein-to-phospholipid ratio of  $22 \text{ mg mmol}^{-1}$   
113 where we would expect three scramblases per vesicle on average<sup>9</sup>, we did not observe the expected  
114 100% reduction in fluorescence. This suggests that not all liposomes are reconstituted with an active  
115 scramblase, as also noted in several studies<sup>32,33</sup>. Notably, previous studies utilizing encapsulated  
116 water-soluble 2-NBD-glucose showed that dithionite cannot pass through the membrane of liposomes  
117 or proteoliposomes in conditions similar to ours<sup>4,34</sup>. This indicates that the greater extent of  
118 fluorescence reduction seen in proteoliposomes versus liposomes is not due to dithionite permeation  
119 into the vesicles. It is rather due to the presence of a scramblase that is able to exchange inner leaflet  
120 lipid reporters with the outer leaflet. Based on these observations we conclude that ATTO488-PE is a

121 suitable reporter of scramblase activity in LUVs, with the high photostability needed for microscopy-  
122 based assays.

123

124 **Formation of pGUVs containing ATTO488-PE and fluorescent ER membrane proteins.** GUVs formed  
125 from proteoliposomes by electroformation have been shown to incorporate and maintain scramblase  
126 activity as evinced by a shape-change assay <sup>24</sup>. We therefore used electroformation to generate  
127 protein-containing GUVs (pGUVs) from ATTO488-PE-containing proteoliposomes reconstituted with  
128 TE647. Briefly, droplets of a proteoliposome suspension, diluted in distilled water, were deposited on  
129 two indium tin oxide (ITO) coated glass slides and dehydrated to form a thin lipid film (Fig. 2). A  
130 chamber was created by sandwiching the slides, with the lipid-film-bearing surfaces facing each other.  
131 The ITO slides were separated with a Teflon spacer with copper electrodes on each side. For  
132 electroformation, 250 mM sucrose solution was injected, and the chamber was exposed to an  
133 oscillating field resulting in the formation of pGUVs. Empty GUVs (eGUVs) were prepared in parallel  
134 from protein-free liposomes. The GUV suspension was removed from the chamber and diluted five-  
135 fold in osmotically matched 250 mM glucose solution (Fig. 3a). The procedure promotes the ability of  
136 the GUVs to sediment for convenient observation. We obtained a high yield of GUVs, as visualized  
137 initially via fluorescence of the ATTO488-PE membrane marker (Fig. 3b, top panels), and subsequently  
138 checked for fluorescence of Alexa647, indicative of the presence of reconstituted proteins (Fig. 3b,  
139 bottom panels). All GUVs generated from proteoliposomes contained protein (Fig. 3b). The size  
140 distribution of the pGUVs and eGUVs was similar (Fig. 3c), with a modal diameter in the range 20-40  
141  $\mu\text{m}$  for both populations. Although the majority of the pGUVs and eGUVs were unilamellar ( $89 \pm 7.6\%$ ,  
142  $n=342$  and  $66 \pm 1.0\%$ ,  $n=340$ , respectively), we noted occasional GUVs with internal tubular structures,  
143 and these were more frequently seen in eGUV preparations (Fig. 3d). GUVs with encapsulated  
144 multilamellar or multivesicular vesicles represented only a small fraction of the population (Fig. 3d).  
145 These observations are consistent with previous reports showing that application of a thin lipid film  
146 on a surface exposed to an electric field results in a high fraction of unilamellar GUVs <sup>25</sup>. Because of  
147 the inaccessible internal bilayers of multilamellar or multivesicular, the latter GUV types were  
148 excluded from our analyses.

149  
150 **Phospholipid scrambling in GUVs detected by dithionite-mediated bleaching of ATTO488-PE.** Next,  
151 we sought to investigate scramblase activity in pGUVs. To establish the necessary protocols, we first  
152 tested the reactivity of ATTO488-PE to dithionite in eGUVs. A trace amount of biotin-PE was included  
153 in preparation of eGUVs to promote their immobilization on avidin-biotin-PEGylated cover glass slides  
154 in an incubation chamber (Fig. 4a). The GUVs were imaged via their ATTO488-PE fluorescence (Fig. 4c,  
155  $t=0$ ). A small volume (1% of the aqueous volume in the chamber) of dithionite solution was added  
156 gently to the chamber (Fig. 4a, bottom panel), without overt mixing in order not to disturb the  
157 settled/attached GUVs. A time series of fluorescence images was captured over the next 12 min (Fig.  
158 4c, upper panels). Buffer treatment was performed in parallel (Fig. 4c, lower panels). The ATTO488-PE  
159 fluorescence intensity of individual eGUVs before, and at different time points after dithionite or  
160 buffer addition, was quantified by image analysis using ImageJ as follows (Fig. 4b). An outline of  
161 individual GUVs was manually defined based on the fluorescence of ATTO488-PE. Membrane  
162 fluorescence was quantified by a circular region of interest (ROI) around each GUV, measuring the  
163 integrated density value (Fig. 4b). A ROI in the lumen of the individual GUV was used to quantify the  
164 background signal per pixel, which was then subtracted from the membrane signal by multiplying with  
165 the area of the membrane ROI. The background signal was typically insignificant but was nevertheless  
166 used as an offset correction as part of our standard procedure. We observed some movement of the  
167 eGUVs on addition of either buffer or dithionite. The movement occurred within and along the focus  
168 plane on the microscope slide indicating that the GUVs were not completely immobilized via the  
169 avidin-biotin-PEG system. Nevertheless, it was possible to track a sufficient number of individual GUVs  
170 that stayed within the field of view due to sedimentation, as indicated in Fig. 4c, and to quantify their  
171 ATTO488 fluorescence before and after dithionite treatment (Fig. 4b, d).

172 Addition of dithionite caused rapid ( $t_{1/2} = 0.58 \pm 0.23$  min,  $n=5$ ) reduction of ATTO488-PE fluorescence  
173 in individual eGUVs (Fig. 4b), reaching a plateau of  $0.53 \pm 0.08$  ( $n=5$ ), i.e., a 47% reduction in  
174 fluorescence. We extended this exemplary analysis to a larger population of eGUVs. Fig. 4c shows end-  
175 point fluorescence ( $t=12$  min) compared with the starting value for individual eGUVs ( $n=23$ ) in samples  
176 treated with either dithionite or buffer; a time course for the dithionite-treated samples is shown in

177 Suppl. Fig. S2. This larger data set (n=23) yielded values comparable to that of our initial analyses of  
178 approximately 44% fluorescence reduction, with  $t_{1/2} = 0.82$  min (Fig. 4d, Suppl. Fig. S2). A few eGUVs  
179 did not react to dithionite (Fig. 4d and Suppl. Fig. S2, 3 of out 26, black open circles), suggesting uneven  
180 diffusion of the reagent over the slide. The ATTO488 fluorescence of eGUVs was not affected when  
181 buffer was applied instead of dithionite (Fig. 4d, compare (iv) versus (iii)). As noted above, physical  
182 displacement of GUVs on addition of dithionite or buffer preventing convenient tracking of a large  
183 number of individual eGUVs. Therefore, in order to increase the sample size for analysis, all eGUVs  
184 within the field of view before and after dithionite treatment were analyzed (Fig. 4e). Here, 43% (n=60)  
185 of the ATTO488-PE fluorescence was reduced upon dithionite treatment (Fig. 4e, compare (ii) versus  
186 (i)), which is comparable to the results of individual tracked vesicles. As expected, buffer treatment  
187 did not affect the fluorescence (Fig. 4d, compare (iv) versus (iii)). These results indicate that the extent  
188 to which dithionite bleaches ATTO488-PE in eGUVs can be reliably determined not only by tracking  
189 individual GUVs, but also by analyzing any in-focus GUVs. The latter approach allows more vesicles to  
190 be counted for each replication, thus greatly expanding the GUV sample size if needed.

191 Before proceeding to investigation of the behavior of ATTO488-PE in pGUVs in response to dithionite,  
192 we first established that dithionite does not permeate across the membrane of these vesicles on  
193 account of their protein content. To this end, we employed the polar fluorophore Alexa Fluor 647  
194 hydrazide. In solution, this fluorophore reacts readily with dithionite (Fig. 5a), confirming that it is a  
195 good reporter of dithionite permeation across the pGUV membrane. pGUVs were generated via  
196 electroformation in the presence of Alexa Fluor 647 hydrazide for luminal inclusion and treated with  
197 10 mM dithionite before observation in the microscope. Quantification of the luminal signal 12 min  
198 after treatment in comparison with buffer treated pGUVs (Fig. 5b), showed that the luminal marker  
199 was protected (Fig. 5c) in all but a minor fraction (<10%) of pGUVs which had somewhat decreased  
200 Alexa Fluor 647 hydrazide fluorescence. We conclude that dithionite cannot enter pGUVs on the time  
201 scale of our experiments.

202 Our results thus far indicate that dithionite treatment of ATTO488-PE-containing eGUVs produces the  
203 expected partial loss of fluorescence, close to 50%, and that dithionite does not permeate across the  
204 GUV membrane, irrespective of whether the GUV contains reconstituted proteins. We next went on



205 to treat ATTO488-PE-containing pGUVs with dithionite to assay scrambling of the fluorescent lipid  
206 reporter. We expected to produce three populations of pGUVs upon dithionite treatment: (i) a minor  
207 population of vesicles that are not affected by dithionite, likely because of uneven spreading of the  
208 applied reagent as discussed above, (ii) a population exhibiting ~43-47% lower fluorescence of  
209 ATTO488-PE (compared with untreated samples) because of lack of a functional scramblase (as for  
210 eGUVs), and (iii) a 'dark' population in which all ATTO488-PE is reduced at the end-point of the assay  
211 because of the presence of a functional scramblase. The latter vesicles would only be detected as  
212 kinetic intermediates exhibiting partial ATTO488-PE fluorescence at early time points.

213 Fig. 6a shows a time series of fluorescence images of ATTO488-PE-containing pGUVs captured over 12  
214 min after dithionite or buffer addition. Quantification of the percentage of ATTO488-PE-positive GUVs  
215 revealed that essentially 100% of eGUVs but only ~29% of pGUVs remained detectable above  
216 background levels 12 min after application of dithionite (Fig. 6b). Alexa Fluor 647 hydrazide-loaded  
217 pGUVs served as control in these experiments to exclude dislodgement or destruction of pGUVs by  
218 dithionite treatment (Fig. 6c). We conclude that whereas the average number of pGUVs in the field of  
219 view was the same irrespective of dithionite treatment (Fig. 6c), ~71% of the population had  
220 completely lost their ATTO488-PE fluorescence by t=12 min.

221 We tracked the rate of fluorescence loss in individual pGUVs upon addition of dithionite and observed  
222 that some pGUVs showed a very fast loss of fluorescence, within ~3 min. Others lost fluorescence  
223 more slowly, going 'dark' by 6 min or remaining detectable even at t=12 min. These latter vesicles had  
224 only  $16 \pm 4.5\%$  (n=3) of their starting fluorescence remaining at t=12 min (Fig. 6e). Indeed, a more  
225 robust sampling of these vesicles indicated that at the 12-min time point they possessed, on average,  
226 ~26% of their starting value of ATTO488-PE fluorescence (Fig. 6d). This behavior is distinct from that  
227 observed for eGUVs or predicted for pGUVs that lack a scramblase - in these cases, the extent of  
228 fluorescence reduction would be expected to be close to 50% (see above). It is therefore likely that  
229 the pGUVs that are still detectable at t=12 min correspond to kinetic intermediates in the scrambling  
230 process. As presented in the Discussion section, slow scrambling in these vesicles is likely because they  
231 contain relatively few scramblases. We conclude that all the pGUVs in our sample are scramblase

232 positive, with the majority demonstrating complete bleaching of the reporter lipid within 5-8 min of  
233 dithionite addition.

234

## 235 **Discussion**

236 We report a method to generate pGUVs containing functional ER phospholipid scramblases and  
237 present a fluorescence-based characterization of scramblase activity at the single vesicle level using a  
238 photostable fluorescent phospholipid as transport reporter. GUVs provide an elegant experimental  
239 system for studies of lipid transporters, as their cell-like size permits observations by light microscopy  
240 techniques of individual vesicles. Realizing the potential of this system for the study of lipid  
241 transporters requires sophisticated flip-flop assays in combination with efficient protein incorporation  
242 into GUVs under conditions that preserve protein activity while still allowing a high yield of GUVs. In  
243 this study, we established a phospholipid scramblase assay for single GUV analysis based on the  
244 irreversible elimination of the fluorescence of an ATTO-dye labeled phospholipid, ATTO488-PE, with  
245 sodium dithionite. Our results show that this photostable lipid derivative readily reacts with dithionite  
246 and is transported by ER scramblases, thus providing a sensitive tool for studying scramblase activity  
247 at single vesicle level. Notably, the fast kinetics of dithionite-mediated reduction of ATTO488-PE might  
248 be helpful in the future for monitoring transbilayer distribution and movement of lipid analogs with  
249 high time resolution, for example in conjunction with stopped-flow techniques<sup>35</sup>.

250 To reconstitute ER membrane proteins in GUVs, we used the electroformation method, where  
251 aqueous dispersions of proteoliposomes with fluorescently labeled yeast ER proteins were deposited  
252 on ITO plates followed by application of an AC-electric field. In line with previous results<sup>22,24,27,36-39</sup>,  
253 this approach resulted in effective formation of thousands of pGUVs per chamber. Under these  
254 conditions, a small fraction of multilamellar and/or tubular vesicles was detected by fluorescence  
255 microscopy and could be excluded from analyses. The pGUVs were prepared from proteoliposomes  
256 of relatively simple lipid composition, although higher lipid complexity can be achieved by mixing the  
257 proteoliposomes with liposome solutions of different compositions prior to electroformation<sup>26</sup>. As  
258 reconstitution of membrane proteins is not always efficient in complex lipid mixtures, especially those

259 containing cholesterol, this procedure would allow future study of the effect of complex lipid mixtures  
260 on protein activity by reconstituting the proteins efficiently into 'simple liposomes' and introducing  
261 the more complex lipid environment during GUV formation. This is an objective for future work.

262 The cell-size diameter of the GUVs allows for single vesicle analysis. Whereas ATTO488-PE bleaching  
263 in eGUVs occurred relatively uniformly with a  $t_{1/2}$  of approximately 1 min reaching an expected extent  
264 of reduction close to 50%, the time course of complete fluorescence loss upon dithionite addition  
265 differed between individual pGUVs. This can be explained by differences in the number of scramblases  
266 per pGUV, with the likely rate-limiting step being scramblase-mediated lipid translocation across the  
267 pGUV bilayer. Thus, if we consider a 30  $\mu\text{m}$  diameter pGUV with a single scramblase, the mean time it  
268 would take for a freely diffusing phospholipid to encounter the scramblase and be captured by it is  
269  $\sim 45$  min (see Materials and Methods). Given the number of phospholipid molecules in one leaflet of  
270 the pGUV, this yields a capture frequency of  $\sim 10^8 \text{ min}^{-1}$ . In comparison, the unitary rate of  
271 phospholipid scramblases is reported as  $>10^5 \text{ s}^{-1}$  or roughly  $\sim 10^7 \text{ min}^{-1}$ . Thus, a single scramblase in a  
272 30  $\mu\text{m}$  diameter pGUV would equilibrate the phospholipid populations of the two leaflets of the  
273 bilayer in several hundred minutes. In order to achieve the rapid loss of ATTO488-PE fluorescence that  
274 we report in individual pGUVs, we estimate that each pGUV must be reconstituted with ten or more  
275 scramblases. This is more than reasonable considering the number of proteoliposomes that contribute  
276 to the electroformation of a single pGUV. Future work will evaluate the kinetics of scrambling as a  
277 function of the number of reconstituted scramblases, a parameter that can be manipulated by  
278 carrying out electroformation using proteoliposomes diluted with protein-free liposomes.

279 In this study, GUV formation was performed under low salt conditions <sup>22,25</sup>, which did not affect the  
280 activity of the ER scramblases. The electroformation technique under low salt conditions has also  
281 been shown to be effective in incorporating and maintaining the activity of the sarcoplasmic  
282 reticulum  $\text{Ca}^{2+}$ -ATPase and the  $\text{H}^+$  pump bacteriorhodopsin in GUVs <sup>22</sup>. However, activity may not be  
283 preserved for all membrane transporters under these conditions. Notably, GUVs can be effectively  
284 prepared in buffers containing physiological salt concentrations by applying a voltage with a higher  
285 frequency ( $\sim 500 \text{ Hz}$ ) <sup>40</sup>. Furthermore, protocols have been established for functional membrane  
286 protein reconstitution into GUVs using detergent-destabilization of preformed GUVs <sup>41</sup>, spontaneous

287 fusion of liposomes<sup>45</sup>, fusion via osmotic shock<sup>47</sup>, charge-mediation<sup>48</sup>, peptide-induced fusion<sup>46</sup>,

288 and gel-assisted swelling<sup>23</sup>. Thus, our assay should be broadly applicable without imposing serious

289 constraints either on GUV composition nor on buffer solution.

## 290 **Materials and Methods**

291 **Materials.** L- $\alpha$ -phosphatidylcholine (egg PC), 1-palmitoyl-2-{6-[(7-nitro-2-1,3-benzoxadiazol-4-  
292 yl)amino]hexanoyl}-*sn*-glycero-3-phosphocholine (C6-NBD-PC), and 1,2-dioleoyl-*sn*-glycero-3-  
293 phosphoethanolamine-N-(cap biotiny) (Biotinyl-PE) were obtained from Avanti Polar Lipids Inc.  
294 (Birmingham, AL, USA). 1,2-dioleoyl-*sn*-glycero-3-phosphoethanolamine headgroup labeled with  
295 ATTO 488 (ATTO488-PE) was obtained from ATTO-TEC GmbH (Siegen, Germany). Bio-Beads SM-2  
296 Resin and Bio-Gel P-6 were obtained from Bio-Rad Laboratories Inc. (Hercules, CA, USA). Unless  
297 indicated otherwise, all other chemicals and reagents were obtained from Sigma-Aldrich (München,  
298 Germany). Protease inhibitor cocktail contained aprotinin (5 mg), leupeptin (5 mg), pepstatin (5 mg),  
299 antipain (25 mg) and benzamidine (785 mg) in 5 ml DMSO used at 1:1000 dilution. All buffers and  
300 solutions used for vesicles were filter-sterilized through a polyethersulfone membrane with a pore  
301 size of 0.2  $\mu$ m (Filtropur, Sarstedt AG & Co. KG, Nümbrecht, Germany).

302 **Preparation of detergent-solubilized ER membrane proteins ('Triton Extract', TE).** TE was prepared  
303 from yeast cells (BY4741 strain) as previously described<sup>9,47</sup>, except for an additional salt-wash step of  
304 the membranes prior to detergent solubilization. Briefly, cells harvested at OD<sub>600</sub> ~2 were washed and  
305 homogenized using glass beads (0.5 mm) in ice-cold lysis buffer (10 mM HEPES-NaOH pH 7.4, 10 mM  
306 MgCl<sub>2</sub>, 5% (w/v) glycerol, 1 mM dithiothreitol) supplemented with protease inhibitor cocktail. After a  
307 low-speed centrifugation (2,500 x *g*<sub>av</sub>, 10 min, 4° C), the supernatant was centrifuged at 200,000 x *g*<sub>av</sub>  
308 (30 min, 4° C) to pellet membranes. The membranes were resuspended in ice-cold resuspension buffer  
309 (10 mM HEPES-NaOH pH 7.4, 100 mM NaCl, protease inhibitor mixture) containing 0.5 M sodium  
310 acetate and incubated on ice for 30 min. Membranes were re-pelleted, resuspended in ice-cold  
311 resuspension buffer and solubilized by gradual addition of an equal volume. of ice-cold extraction  
312 buffer (10 mM HEPES-NaOH pH 7.4, 100 mM NaCl, 2% (w/v) Triton X-100, 0.5 mM  
313 phenylmethylsulfonyl fluoride, protease inhibitor cocktail) with a final concentration of 1% (w/v)  
314 Triton X-100. Samples were incubated on ice for 30 min before insoluble material was removed by  
315 centrifugation (200,000 x *g*<sub>av</sub>, 1 h, 4° C) to generate a clear supernatant (TE), which was collected,  
316 aliquoted, snap frozen in liquid nitrogen and stored at -80° C. Protein content was determined by the  
317 micro bicinchoninic acid protein assay kit (Thermo Fisher Scientific, Rockford, IL, USA).

318 **Labeling TE proteins with a fluorescent dye.** TE proteins were fluorescently labeled with the amine-  
319 reactive dye Alexa Fluor 647 NHS-Ester (Thermo Fisher Scientific, Rockford, IL, USA) as follows. TE (95  
320  $\mu\text{g}$ ) was mixed with 5.7 nmol of Alexa Fluor 647 NHS-Ester in labeling buffer (2 mM HEPES-NaOH pH  
321 8.3, 1 mM NaCl, 1% (w/v) Triton X-100) for 1 h under end-over-end mixing. Unreacted dye was  
322 removed by two passages over an equilibrated Bio-spin® 6 column filled with Bio-gel P-6 media in  
323 labeling buffer and centrifuged in a tabletop centrifuge (Eppendorf 5810 R, rotor A-4-62) at 1500 rpm  
324 for 3 min. The eluate (termed TE647) was used immediately for proteoliposome reconstitution.

325 **Reconstitution of proteoliposomes.** Proteoliposomes were prepared from a mixture of unlabeled TE  
326 or TE647 and Triton X-100-solubilized phospholipids as previously described <sup>9</sup>. Briefly, egg PC (4.5  
327  $\mu\text{mol}$ ), fluorescent lipids (0.1 mol% ATTO488-PE or 0.3 mol% C6-NBD-PC), and biotinyl-PE (1 mol%) in  
328 chloroform were dried under nitrogen in a glass screw-cap tube and then dissolved in Triton X-100  
329 containing buffer (2 mM HEPES-NaOH pH 7.4, 1 mM NaCl, 1% (w/v) Triton X-100). TE was added to  
330 solubilized lipids to a protein/phospholipid ratio of 22 mg  $\text{mmol}^{-1}$ . Protein-free liposomes were  
331 prepared similarly by replacing TE with buffer. Liposome formation was induced by detergent removal  
332 using Bio-Beads SM-2 (prewashed with methanol, water, and buffer) over two stages: 100 mg Bio-  
333 Beads SM-2 incubation with end-over-end mixing for 3 h followed by additional 200 mg Bio-Beads SM-  
334 2 with end-over-end mixing overnight at 4° C. The resulting vesicles were collected and stored at 4° C  
335 until use.

336 **Liposome analysis.** Protein reconstitution was detected by SDS-PAGE under reducing conditions on a  
337 10% polyacrylamide gel, followed by in-gel fluorescence scanning of Alexa 647 (ChemiDoc™ MP  
338 device, Bio-Rad Laboratories GmbH, München, Germany) and silver staining (GE Healthcare, Uppsala,  
339 Sweden). The phospholipid recovery in reconstituted liposomes was 70-90%, as described previously  
340 <sup>9</sup>. More than 99.98% of the initial Triton X-100 amount was removed, as determined by extraction  
341 with four volumes of chloroform/methanol (1/2, v/v) and measurement of the absorbance of the  
342 supernatant at 275 nm <sup>48</sup>. To assay the flip-flop of fluorescent lipids, the fluorescence of the vesicles  
343 was measured at 25° C with a fluorometer equipped with magnetic stirring (PTI-Quantmaster 800,  
344 Horiba, Benzheim, Germany). Proteoliposomes (50  $\mu\text{l}$ ) were diluted into 2 ml (final) of external  
345 solution containing 2 mM HEPES-NaOH pH 7.4, 1 mM NaCl. Fluorescence traces were recorded for

346 ATTO488 at  $\lambda_{\text{ex}}/\lambda_{\text{em}}$  507/530 nm, and for NBD at  $\lambda_{\text{ex}}/\lambda_{\text{em}}$  470/534 nm, for 300 s, slit width 4-5 nm,  
347 resolution 0.1 s. Sodium dithionite (Thermo Fisher Scientific) was added after 30 s to the cuvette to  
348 start the reaction (40  $\mu\text{l}$  of a 1 M stock solution prepared in 0.5 M unbuffered Tris; 20 mM final  
349 concentration). Data were collected using FelixGx 4.9.0 at a sampling rate of 1 Hz. To confirm complete  
350 reduction of all analogues by dithionite, Triton X-100 was added to a final concentration of 0.5% (w/v).  
351 The percentage of fluorescent lipid that was reduced ( $F_{\text{red}}$ ) was calculated as  $(F - F_{\text{end}})/(F_{\text{start}} - F_{\text{end}}) \times$   
352 100, where  $F$  is the fluorescence of liposomes at the given time,  $F_{\text{end}}$  is the last 20 s of fluorescence  
353 after Triton X-100 addition,  $F_{\text{start}}$  is initial fluorescence of liposomes 15 s before dithionite addition.  
354 The half-times for dithionite reduction were obtained by nonlinear regression curve fitting to a one-  
355 phase exponential decay curve using Prism version 9.1.0 (GraphPad Software, San Diego, CA).

356 **Preparation of giant unilamellar vesicles (GUVs).** GUVs were generated from proteoliposomes or  
357 liposomes in a chamber made of indium-tin-oxide-coated (ITO) glass slides (Präzisions Glas & Optik  
358 GmbH, Iserlohn, Germany) by electroformation<sup>22,25</sup>. Briefly, proteoliposomes or liposomes were  
359 diluted with distilled water to a lipid concentration of 0.8 mg ml<sup>-1</sup>, and 50  $\mu\text{l}$  of this suspension was  
360 applied as droplets on each UV-cleaned glass slide and dehydrated overnight in a sealed chamber  
361 containing a saturated NaCl solution. Subsequently, a chamber was formed by separating the ITO glass  
362 slides with a Teflon spacer containing copper electrodes. The chamber was sealed and filled with 1 ml  
363 250 mM sucrose solution. GUVs were electroformed by applying a sinusoidal voltage for 4 h (12 or 20  
364 Hz, 0.2-1.3 V, increasing every 6 min). Detachment of the GUVs from the slides occurred by applying  
365 a second sinusoidal voltage for 30 min (2.0 V, 4 Hz). GUVs were gently transferred and stored in a 1.5  
366 ml tube.

367 **PEGylation of cover glass slides.** Glass coverslips (26 x 76 mm, #1.5, Thermo Fisher Scientific) were  
368 cleaned in glass jars as described previously<sup>49</sup>, except for the Piranha etching, followed by amino-  
369 silanization using 3-aminopropylthriethoxysilane. Surface PEGylation was performed according to  
370 Lamichhane et al.<sup>50</sup> using mPEG-SC (5,000 Da, Laysan Bio Inc., Arab, AL) and biotin-PEG-SC (5,000 Da,  
371 Laysan Bio Inc.), introducing 5% biotinylated PEG, and stored at -20° C until use.

372 **GUV immobilization.** GUVs were immobilized on biotin-PEGylated cover glass slides via avidin binding.  
373 A chamber was formed by gluing a sticky-Slide 8 Well  $\mu$ -Slide from Ibidi (Munich, Germany) onto the

374 PEGylated cover glass slide using Norland Optical Adhesive 60 (Norland Products, Cranbury, USA)  
375 followed by 2 min UV radiation (Ultra-Violet/Ozone Probe and Surface Decontamination Unit,  
376 novascan, Boone, IA). Avidin (200  $\mu$ l, 0.025 mg ml<sup>-1</sup> in distilled water) was added to each chamber.  
377 After 20 min incubation, free avidin was removed by washing four times with 250 mM glucose  
378 solution. GUVs (100  $\mu$ l) were added using a cut pipet tip and the chamber was filled up to 500  $\mu$ l with  
379 250 mM glucose solution.

380 **Microscopy.** Fluorescence microscopy and image acquisition were carried out using a Leica TCS SP8  
381 confocal laser scanning microscope (Leitz, Wetzlar, Germany) equipped with 63x/1.20 water objective.  
382 Images were acquired using a 400 Hz unidirectional scanner, a pixel size of 246.27x246.27  $\mu$ m, a  
383 pinhole of 100  $\mu$ m (1 AU) with Leica HyD detectors. The  $\lambda_{ex}/\lambda_{em}$  used for imaging were as follows:  
384 ATTO488 507/517-550 nm, Alexa647 645/655-780 nm, and Alexa Fluor 647 hydrazide 651/661-780  
385 nm. Images were scanned using the same conditions of the pinhole, gain, laser power (10% for  
386 ATTO488-PE), and detector offset in each experiment.

387 **GUV image analysis.** To assay the flip-flop of ATTO488-PE, up to thirteen images were obtained before  
388 and after dithionite treatment. Dithionite was dissolved immediately before use in 250 mM glucose  
389 solution and added as 5  $\mu$ l (2 mM final concentration) to the GUV containing glass slide chamber. A  
390 time series was started immediately, obtaining five consecutive images at 0.5, 3, 6, 9 and 12 minutes.  
391 Buffer treatments were performed as described for dithionite addition. To assess dithionite  
392 permeation, GUVs were generated in 250 mM sucrose solution containing 10  $\mu$ M Alexa Fluor 647  
393 hydrazide, a soluble dye that cannot cross membranes (Thermo Fisher Scientific). Subsequently, GUVs  
394 were mixed 1:1 (v/v) in 250 mM glucose solution in a 1.5 ml tube to a final volume of 200  $\mu$ l. Dithionite  
395 (100  $\mu$ l) was added to a final concentration of 10 mM and the tube was gently inverted three times.  
396 GUVs were transferred to PEGylated cover glass slides using a cut pipet tip and allowed to sediment.  
397 Images was obtained 12 min after dithionite addition. The dithionite reactivity of free 10  $\mu$ M Alexa  
398 Fluor 647 hydrazide ( $\lambda_{ex}/\lambda_{em}$  649/666 nm) in 250 mM sucrose solution was assayed at 25° C in a stirred  
399 cuvette using PTI-Quantamaster 800.

400 **Data analysis.** Quantitative data are presented as mean  $\pm$  standard deviation (s.d.). The data was  
401 analyzed with ANOVA followed by Šídák's multiple-comparison test or two-tailed Student *t* test. The



402 statistical analyses were carried out using GraphPad Prism version 9.1.0. The number of replicates is  
403 reported in figure captions. P values of less than 0.05 were regarded as statistically significant.

404 **Calculations.** We estimated the mean time ( $t_{dc}$  or 'mean time to capture') it would take for a  
405 phospholipid diffusing in the GUV membrane to encounter a scramblase, considered here as a fixed  
406 absorbing region of radius  $s$ . We assume that the GUV is 30  $\mu\text{m}$  in diameter and has a single  
407 scramblase, and that phospholipids diffuse in the GUV membrane with a diffusion coefficient  $D$ .  
408 Included in the calculation is the distance  $b$ , equal to half the circumference of the GUV, i.e., the  
409 distance from the scramblase at which as many lipids cross a boundary moving towards the  
410 scramblase as away from it. For the case here where  $s/b \ll 1$ ,  $t_{dc} = (b^2/2D) \cdot (\ln(b/s) - 3/4)$  <sup>37,38</sup>. Taking  $b$   
411 =  $4.71 \times 10^{-5}$  m,  $D = 4 \times 10^{-12}$  m<sup>2</sup> s<sup>-1</sup> (from Ref. 39), and  $s = 1.8 \times 10^{-9}$  m (the cross-sectional radius of a  
412 cylindrical opsin molecule) <sup>40</sup>,  $t_{dc} = 2610$  s or 43.5 min. As the number of phospholipids ( $P$ ) in a single  
413 leaflet of a 30  $\mu$  GUV is  $\sim 4.35 \times 10^9$  (calculated from the surface area of the GUV, and assuming that  
414 the cross-sectional area of a single phospholipid is  $0.65 \times 10^{-18}$  m<sup>2</sup> (from Ref. 45), the frequency of  
415 phospholipid capture by the scramblase is  $P/t_{dc} = 10^8$  min<sup>-1</sup>.

416

#### 417 **Online supplemental material**

418 Suppl. Fig. S1 outlines and validates liposome reconstitution with fluorescently labeled endoplasmic  
419 reticulum (ER) membrane proteins. Suppl. Fig. S2 provides additional data on eGUVs to support the  
420 results shown in Fig. 4b.

421

#### 422 **Acknowledgments**

423 We gratefully acknowledge Alice Verchère and Anne-Mette Petersen for assistance in TE purification,  
424 Eckhard Hofmann and Christian Herrmann (Ruhr University, Bochum) for access to instrumentation,  
425 Robert Tampé and Tim Diederichs (Goethe University, Frankfurt) for helpful discussions and technical  
426 advice on the project, and André Nadler (MPI-CBG Dresden) for discussion. This work was supported

428 213/886-1 FUGG to T.G.P).

429

### 430 **Conflicts of interest**

431 The authors declare no competing financial interests.

432

### 433 **Author contributions**

434 P.P.M.M., A.K.M., and T.G.P. conceived and designed the project. T.G.P. and A.K.M supervised the

435 research. P.P.M.M. performed and analyzed the experiments. P.P.M.M. wrote the first version of the

436 manuscript and revised it with the help of A.K.M. and T.G.P. All authors reviewed the final version.

437

438

### 439 **References**

440 1. Williamson, P. Phospholipid scramblase. *Lipid Insights* **8(S1)**, 41–44 (2015).

441 2. Günther-Pomorski, T., Menon, A. K. LIPID SOMERSAULTS: UNCOVERING THE MECHANISMS

442 OF PROTEIN-MEDIATED LIPID FLIPPING. *ELSEVIER* **64**, 69–84 (2016).

443 3. Menon, I. *et al.* Opsin is a phospholipid flippase. *Curr Biol* . 2011 January **21**, 149–153 (2011).

444 4. Goren, M. A. *et al.* Constitutive phospholipid scramblase activity of a G protein-coupled

445 receptor. *Nat. Commun.* **5**, (2014).

446 5. Morra, G. *et al.* Mechanisms of Lipid Scrambling by the G Protein-Coupled Receptor Opsin.

447 *Structure* **26**, 356–367 (2018).

448 6. Suzuki, J., Umeda, M., Sims, P. J. & Nagata, S. Calcium-dependent phospholipid scrambling by

449 TMEM16F. *Nature* **468**, 834–840 (2010).

450 7. Suzuki, J., Imanishi, E. & Nagata, S. Exposure of phosphatidylserine by Xkrelated protein

- 451 family members during apoptosis. *J. Biol. Chem.* **289**, 30257–30267 (2014).
- 452 8. Buton, X. *et al.* Transbilayer movement of monohexosylsphingolipids in endoplasmic  
453 reticulum and Golgi membranes. *Biochemistry* **41**, 13106–13115 (2002).
- 454 9. Chalal, M., Menon, I., Turan, Z. & Menon, A. K. Reconstitution of glucosylceramide flip-flop  
455 across endoplasmic reticulum: Implications for mechanism of glycosphingolipid biosynthesis.  
456 *J. Biol. Chem.* **287**, 15523–15532 (2012).
- 457 10. Menon, A. K., Watkins, W. E. & Hrafnisdóttir, S. Specific proteins are required to translocate  
458 phosphatidylcholine bidirectionally across the endoplasmic reticulum. *Curr. Biol.* **10**, 241–252  
459 (2000).
- 460 11. Sanyal, S., Frank, C. G. & Menon, A. K. Distinct flippases translocate glycerophospholipids and  
461 oligosaccharide diphosphate dolichols across the endoplasmic reticulum. *Biochemistry* **47**,  
462 7937–7946 (2008).
- 463 12. Chang, Q. L., Gummadi, S. N. & Menon, A. K. Chemical modification identifies two  
464 populations of glycerophospholipid flippase in rat liver ER. *Biochemistry* **43**, 10710–10718  
465 (2004).
- 466 13. Larsen, J., Hatzakis, N. S. & Stamou, D. Observation of inhomogeneity in the lipid composition  
467 of individual nanoscale liposomes. *J. Am. Chem. Soc.* **133**, 10685–10687 (2011).
- 468 14. Aden, S., Snoj, T. & Anderluh, G. The use of giant unilamellar vesicles to study functional  
469 properties of pore-forming toxins. *Methods Enzymol.* 219–251 (2021).
- 470 15. Velasco-Olmo, A., Ormaetxea Gisasola, J., Martinez Galvez, J. M., Vera Lillo, J. & Shnyrova, A.  
471 V. Combining patch-clamping and fluorescence microscopy for quantitative reconstitution of  
472 cellular membrane processes with Giant Suspended Bilayers. *Sci. Rep.* **9**, 1–12 (2019).
- 473 16. Bagatolli, L. A. & Needham, D. Quantitative optical microscopy and micromanipulation  
474 studies on the lipid bilayer membranes of giant unilamellar vesicles. *Chem. Phys. Lipids* **181**,  
475 99–120 (2014).
- 476 17. García-Sáez, A. J., Carrer, D. C. & Schwille, P. *Fluorescence correlation spectroscopy for the*

- 477 study of membrane dynamics and organization in giant unilamellar vesicles. *Methods in*  
478 *Molecular Biology, Humana Press* vol. 606 (2010).
- 479 18. Barooji, Y. F., Rørvig-Lund, A., Semsey, S., Reihani, S. N. S. & Bendix, P. M. Dynamics of  
480 membrane nanotubes coated with I-BAR. *Sci. Rep.* **6**, 1–12 (2016).
- 481 19. Kahya, N., Scherfeld, D., Bacia, K. & Schwille, P. Lipid domain formation and dynamics in giant  
482 unilamellar vesicles explored by fluorescence correlation spectroscopy. *J. Struct. Biol.* **147**,  
483 77–89 (2004).
- 484 20. Weinberger, A. *et al.* Gel-assisted formation of giant unilamellar vesicles. *Biophys. J.* **105**,  
485 154–164 (2013).
- 486 21. Stachowiak, J. C. *et al.* Unilamellar vesicle formation and encapsulation by microfluidic jetting.  
487 *Proc. Natl. Acad. Sci. U. S. A.* **105**, 4697–4702 (2008).
- 488 22. Girard, P. *et al.* A new method for the reconstitution of membrane proteins into giant  
489 unilamellar vesicles. *Biophys. J.* **87**, 419–429 (2004).
- 490 23. Garten, M., Aimon, S., Bassereau, P. & Toombes, G. E. S. Reconstitution of a transmembrane  
491 protein, the voltage-gated ion channel, KvAP, into giant unilamellar vesicles for microscopy  
492 and patch clamp studies. *J. Vis. Exp.* 1–16 (2015).
- 493 24. Papadopoulos, A. *et al.* Flippase activity detected with unlabeled lipids by shape changes of  
494 giant unilamellar vesicles. *J. Biol. Chem.* **282**, 15559–15568 (2007).
- 495 25. Angelova, M. & Dimitrov, D. S. A mechanism of liposome electroformation. *Trends Colloid*  
496 *Interface Sci. II* 59–67 (2007).
- 497 26. Bhatia, T. *et al.* Preparing giant unilamellar vesicles (GUVs) of complex lipid mixtures on  
498 demand: Mixing small unilamellar vesicles of compositionally heterogeneous mixtures.  
499 *Biochim. Biophys. Acta - Biomembr.* **1848**, 3175–3180 (2015).
- 500 27. Park, S. H. & Majd, S. Reconstitution and functional studies of hamster P-glycoprotein in giant  
501 liposomes. *PLoS One* **13**, 1–20 (2018).

- 502 28. Vishwakarma, R. A. *et al.* New fluorescent probes reveal that flippase-mediated flip-flop of  
503 phosphatidylinositol across the endoplasmic reticulum membrane does not depend on the  
504 stereochemistry of the lipid. *Org. Biomol. Chem.* **3**, 1275–1283 (2005).
- 505 29. Vehring, S. *et al.* Flip-flop of fluorescently labeled phospholipids in proteoliposomes  
506 reconstituted with *Saccharomyces cerevisiae* microsomal proteins. *Eukaryot. Cell* **6**, 1625–  
507 1634 (2007).
- 508 30. Hughes, L. D., Rawle, R. J. & Boxer, S. G. Choose your label wisely: Water-soluble fluorophores  
509 often interact with lipid bilayers. *PLoS One* **9**, (2014).
- 510 31. Andra, K. K., Dorsey, S., Royer, C. A. & Menon, A. K. Structural mapping of fluorescently-  
511 tagged, functional nhTMEM16 scramblase in a lipid bilayer. *J. Biol. Chem.* **293**, 12248–12258  
512 (2018).
- 513 32. Ploier, B. *et al.* Dimerization deficiency of enigmatic retinitis pigmentosa-linked rhodopsin  
514 mutants. *Nat. Commun.* **7**, 1–11 (2016).
- 515 33. Lee, S. Y., Letts, J. A. & MacKinnon, R. Functional Reconstitution of Purified Human Hv1 H+  
516 Channels. *J. Mol. Biol.* **387**, 1055–1060 (2009).
- 517 34. Pandey, K. *et al.* An engineered opsin monomer scrambles phospholipids. *Sci. Rep.* **7**, 1–11  
518 (2017).
- 519 35. Marx, U. *et al.* Rapid flip-flop of phospholipids in endoplasmic reticulum membranes studied  
520 by a stopped-flow approach. *Biophys. J.* **78**, 2628–2640 (2000).
- 521 36. Gutierrez, M. G., Mansfield, K. S. & Malmstadt, N. The Functional Activity of the Human  
522 Serotonin 5-HT1A Receptor Is Controlled by Lipid Bilayer Composition. *Biophys. J.* **110**, 2486–  
523 2495 (2016).
- 524 37. Aimon, S. *et al.* Functional reconstitution of a voltage-gated potassium channel in giant  
525 unilamellar vesicles. *PLoS One* **6**, (2011).
- 526 38. Doeven, M. K. *et al.* Distribution, lateral mobility and function of membrane proteins  
527 incorporated into giant unilamellar vesicles. *Biophys. J.* **88**, 1134–1142 (2005).

- 528 39. Pott, T., Bouvais, H. & Méléard, P. Giant unilamellar vesicle formation under physiologically  
529 relevant conditions. *Chem. Phys. Lipids* **154**, 115–119 (2008).
- 530 40. Méléard, P., Bagatolli, L. A. & Pott, T. Giant Unilamellar Vesicle Electroformation. From Lipid  
531 Mixtures to Native Membranes Under Physiological Conditions. *Methods Enzymol.* **465**, 161–  
532 176 (2009).
- 533 41. Dezi, M., Di Cicco, A., Bassereau, P. & Lévy, D. Detergent-mediated incorporation of  
534 transmembrane proteins in giant unilamellar vesicles with controlled physiological contents.  
535 *Proc. Natl. Acad. Sci. U. S. A.* **110**, 7276–7281 (2013).
- 536 42. Blesneac, I., Moreau, C. & Liguori, L. A Simple Method for the Reconstitution of Membrane  
537 Proteins into Giant Unilamellar Vesicles. 85–92 (2010).
- 538 43. Motta, I. *et al.* Formation of Giant Unilamellar Proteo-Liposomes by Osmotic Shock. *Langmuir*  
539 **31**, 7091–7099 (2015).
- 540 44. Ditri, E. L. Z. and J. W. Direct detection of SERCA calcium transport and small-molecule  
541 inhibition in giant unilamellar vesicles. *Physiol. Behav.* **176**, 139–148 (2017).
- 542 45. Biner, O., Schick, T., Müller, Y. & von Ballmoos, C. Delivery of membrane proteins into small  
543 and giant unilamellar vesicles by charge-mediated fusion. *FEBS Lett.* **590**, 2051–2062 (2016).
- 544 46. Kahya, N., Pécheur, E. I., De Boeij, W. P., Wiersma, D. A. & Hoekstra, D. Reconstitution of  
545 membrane proteins into giant unilamellar vesicles via peptide-induced fusion. *Biophys. J.* **81**,  
546 1464–1474 (2001).
- 547 47. Verchère, A. *et al.* Complexity of the eukaryotic dolichol-linked oligosaccharide scramblase  
548 suggested by activity correlation profiling mass spectrometry. *Sci. Rep.* **11**, 1–14 (2021).
- 549 48. Hrafnadóttir, S. & Menon, A. K. Reconstitution and partial characterization of phospholipid  
550 flippase activity from detergent extracts of the *Bacillus subtilis* cell membrane. *J. Bacteriol.*  
551 **182**, 4198–4206 (2000).
- 552 49. Chandradoss, S. D. *et al.* Surface passivation for single-molecule protein studies. *J. Vis. Exp.* 1–  
553 8 (2014).

- 554 50. Lamichhane, R., Solen, A. & David Rueda, W. B. Single Molecule FRET of Protein-Nucleic Acid  
555 and Protein-Protein complexes: Surface Passivation and Immobilization. *Methods* **100**, 130–  
556 134 (2012).
- 557 51. Berg, H. C. & Purcell, E. M. Physics of chemoreception. *Biophys. J.* **20**, 193–219 (1977).
- 558 52. Goldstein, B., Wofsy, C. & Bell, G. Interactions of low density lipoprotein receptors with  
559 coated pits on human fibroblasts: estimate of the forward rate constant and comparison with  
560 the diffusion limit. *Proc. Natl. Acad. Sci. U. S. A.* **78**, 5695–5698 (1981).
- 561 53. Macháň, R. & Hof, M. Lipid diffusion in planar membranes investigated by fluorescence  
562 correlation spectroscopy. *Biochim. Biophys. Acta - Biomembr.* **1798**, 1377–1391 (2010).
- 563 54. Eskandari, S., Wright, E. M., Kreman, M., Starace, D. M. & Zampighi, G. A. Structural analysis  
564 of cloned plasma membrane proteins by freeze-fracture electron microscopy. *Proc. Natl.*  
565 *Acad. Sci. U. S. A.* **95**, 11235–11240 (1998).
- 566 55. Petrache, H. I., Dodd, S. W. & Brown, M. F. Area per lipid and acyl length distributions in fluid  
567 phosphatidylcholines determined by <sup>2</sup>H NMR spectroscopy. *Biophys. J.* **79**, 3172–3192 (2000).

568

569

570

571

Figure 1

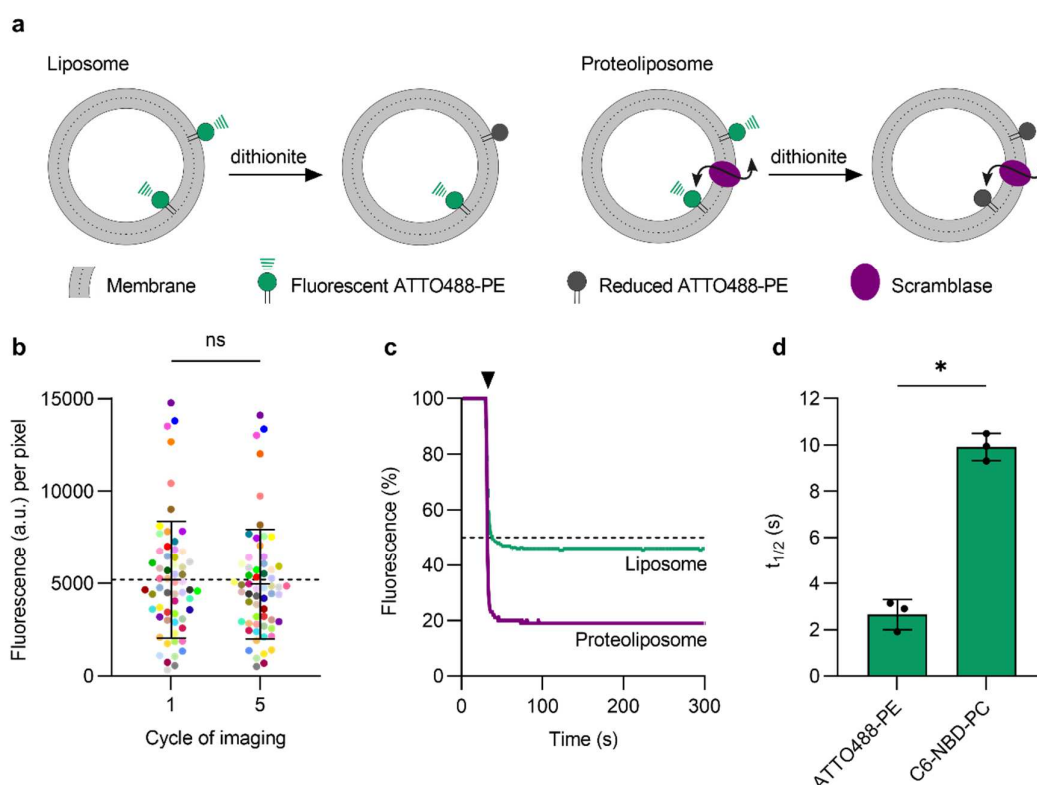

572

573 **Figure 1. ATTO488-PE is an effective reporter of phospholipid scrambling in large unilamellar**  
 574 **vesicles reconstituted with ER membrane proteins. (a)** Schematic illustration of the scramblase  
 575 activity assay. The assay makes use of large unilamellar vesicles that contain a trace amount of  
 576 ATTO488-PE distributed equally between both leaflets and exploits the ability of dithionite to  
 577 chemically reduce the ATTO488 fluorophore, thereby irreversibly eliminating its fluorescence. In  
 578 protein-free liposomes (left), ATTO488-PE in the outer leaflet is bleached upon addition of membrane-  
 579 impermeant dithionite, whereas the inner leaflet pool is protected, resulting in 50% loss of  
 580 fluorescence. For proteoliposomes with a functional scramblase (right), ATTO488-PE exchanges  
 581 rapidly between the leaflets, resulting in 100% loss of fluorescence upon dithionite addition. **(b)**  
 582 Photostability of ATTO488-PE in GUVs. Fluorescence intensity of individual ATTO488-PE labelled GUVs  
 583 (color-matched between the image cycles, n=60) before and after five confocal imaging scans. The  
 584 mean  $\pm$  s.d. is indicated. **(c)** Representative traces showing fluorescence loss on adding dithionite to  
 585 protein-free liposomes (green) and proteoliposomes (purple) reconstituted with ER membrane  
 586 proteins. The arrowhead indicates dithionite addition. The horizontal dashed line corresponds to 50%



587 loss of fluorescence. (d) Half-time of dithionite-mediated fluorescence reduction of ATR-PC and

588 C6-NBD-PC reconstituted into liposomes. Results are presented as mean  $\pm$  s.d. of at least three

589 independent reconstitutions (unpaired *t* test with Welch's correction, \**P* < 0.0005).

590

591

Figure 2

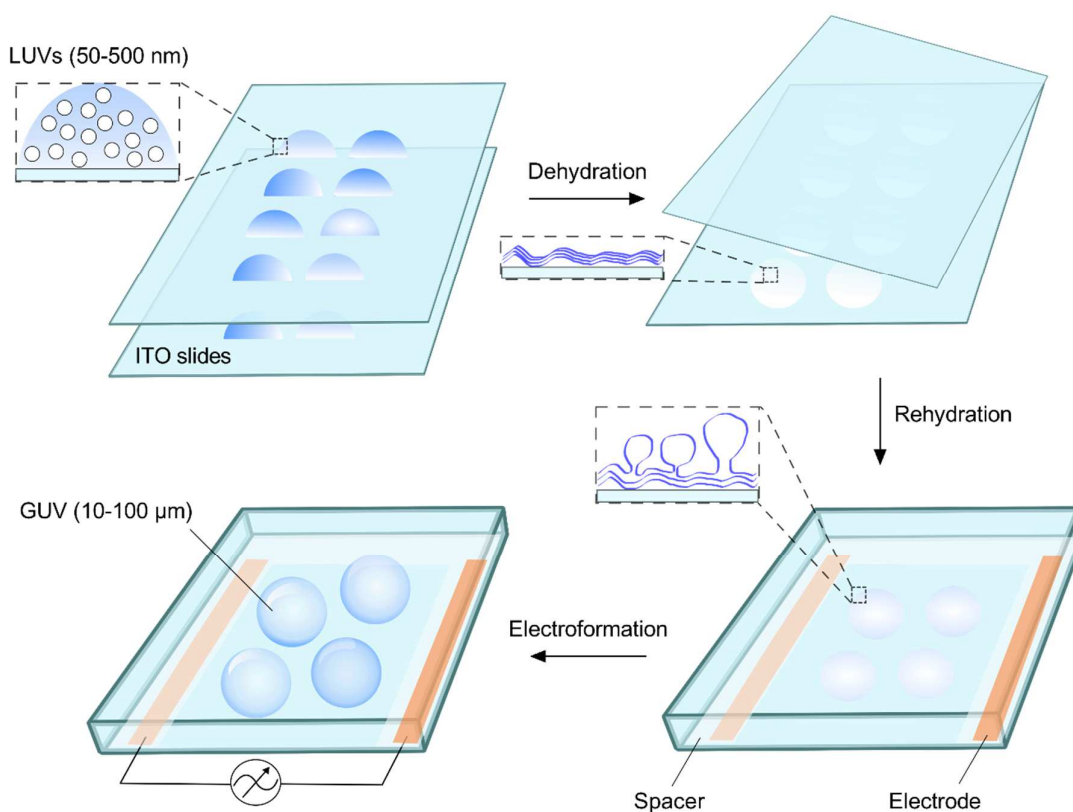

592

593 **Figure 2. Electroformation of GUVs.** Liposomes or proteoliposomes, diluted in distilled water, are  
594 applied in droplets on the conductive surface of each of two glass slides coated with indium tin oxide  
595 (ITO). The solution is dehydrated overnight in a chamber containing saturated sodium chloride,  
596 resulting in the formation of a thin lipid film. The two slides are then assembled into a chamber so  
597 that the conducting surfaces with the lipid film face each other, separated by a Teflon spacer  
598 containing copper electrodes on each side. The chamber is sealed and held together by clamps (not  
599 illustrated), before being connected to a power source and exposed to an oscillating electric field upon  
600 injection of 250 mM sucrose solution, resulting in GUV formation.

601

602

Figure 3

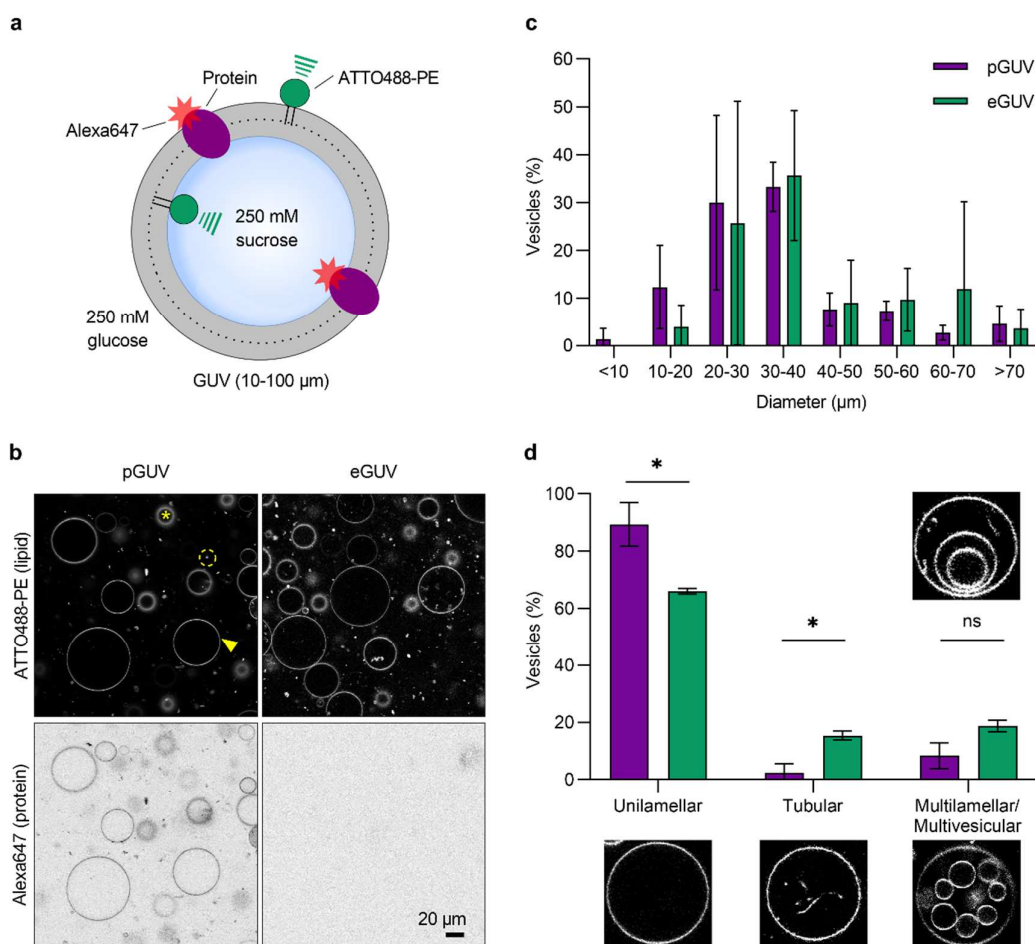

603

604 **Figure 3. Characteristics of GUVs.** (a) Protein-containing GUVs (pGUVs) generated in 250 mM sucrose  
 605 solution were diluted in 250 mM glucose solution for observation. (b) Confocal images of pGUVs and  
 606 empty (protein-free) GUVs (eGUVs) showing fluorescence channels corresponding to ATTO488-PE and  
 607 Alexa647-labeled ER proteins). The arrowhead indicates an exemplary GUV used for analysis. The  
 608 asterisk indicates an out-of-focus GUV and the dashed circle indicates a free floating proteoliposome.  
 609 (c, d) Size and morphology distribution of pGUVs (purple, n=342) and eGUVs (green, n=340). Data are  
 610 presented as mean  $\pm$  s.d. of three technical replicates (two-way ANOVA with Šídák's multiple-  
 611 comparisons test, \* $P < 0.05$ ).

612

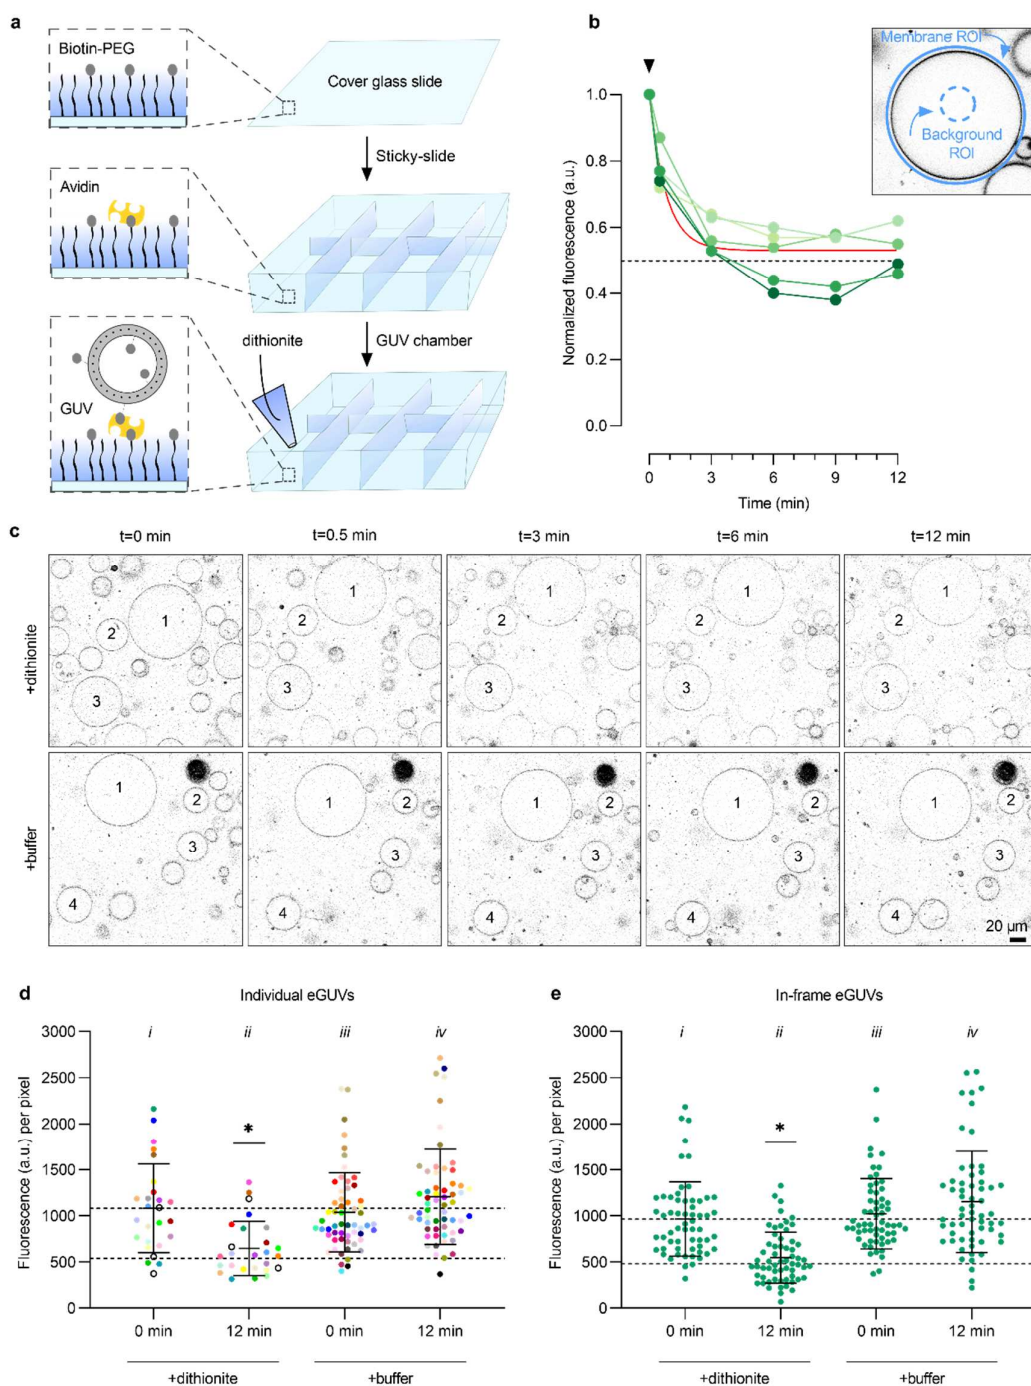

614

615 **Figure 4. Dithionite bleaching of ATTO488-PE in empty GUVs.** (a) Microscope chambers were  
 616 assembled by gluing a sticky-slide onto a biotin-PEGylated cover glass slide to which avidin was added.  
 617 Unbound avidin was washed away before the GUV suspension was added and observed via confocal  
 618 microscopy. Dithionite (or buffer) was added to the field of view once the GUVs had sedimented. (b)  
 619 Dithionite reduction of ATTO488-PE fluorescence of five eGUVs (coded in different shades of green).

620 The arrowhead indicates dithionite addition. The red line is a monoexponential fit to the combined  
621 data ( $t_{1/2}=0.56$  min,  $\text{span}=0.47$ ). *Inset*, protocol for quantification of ATTO488-PE membrane  
622 fluorescence. An outer region of interest (ROI) is placed around the GUV membrane and its total  
623 fluorescence is determined. Next, a ROI is defined within the GUV lumen to quantify background  
624 fluorescence. The average fluorescence per pixel of the luminal ROI is determined and scaled to the  
625 pixel area of the outer ROI for background subtraction. (c) Confocal images of ATTO488-PE-containing  
626 eGUVs before ( $t=0$ ) and at different times after dithionite addition ( $t=0.5, 3, 6, 12$  min). Identical  
627 eGUVs (numbered) were followed over the time series. (d) Dot plot of ATTO488-PE fluorescence from  
628 individually tracked eGUVs (color-matched between the time points) before and 12 min after  
629 dithionite ( $n=26$ ) or buffer treatment ( $n=60$ ). Black open circles indicate eGUVs that did not react to  
630 dithionite. (e) Scatter plot of ATTO488-PE fluorescence from all individual eGUVs within the field of  
631 view before and 12 min after dithionite and buffer treatment ( $n=60$ ). Black lines indicate mean  $\pm$  s.d.  
632 (one-way ANOVA with Šídák's multiple-comparisons test,  $*P < 0.05$ ). The horizontal dashed lines are  
633 provided as a guide to indicate 100% and 50% levels of fluorescence based on the mean value at  $t=0$ .

634

Figure 5

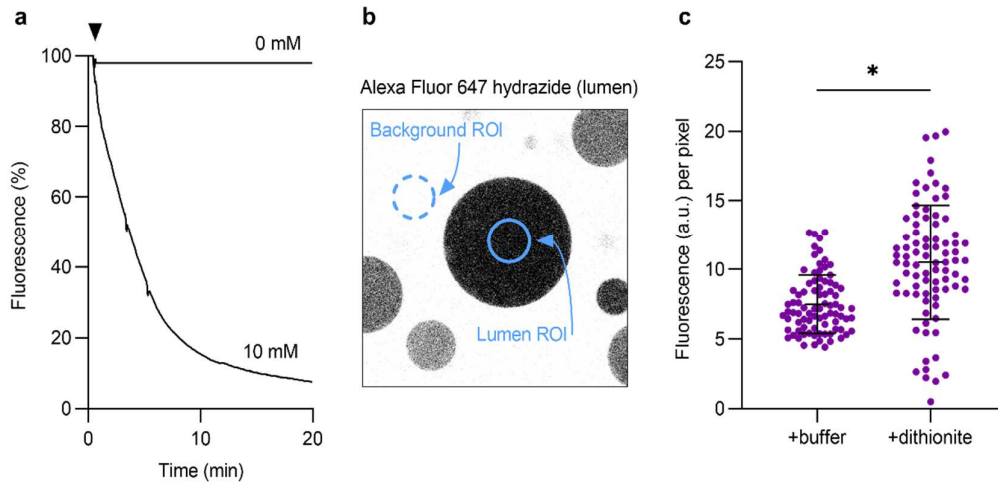

635

636 **Figure 5. Dithionite does not permeate across the membrane of pGUVs.** (a) Fluorescence time trace  
637 of 10  $\mu$ M Alexa Fluor 647 hydrazide in 250 mM sucrose solution upon addition of 10 mM dithionite. A  
638 buffer control (0 mM dithionite) is shown for comparison. The arrowhead indicates dithionite or buffer  
639 addition. (b) Confocal image of pGUVs with trapped Alexa Fluor 647 hydrazide. A ROI was placed  
640 within the GUV for fluorescence quantification, from which the mean of four background ROIs was  
641 subtracted. (c) Dot plot of Alexa Fluor 647 hydrazide fluorescence of individual GUVs 12 min after  
642 buffer or dithionite addition (n=84). Black lines indicate mean  $\pm$  s.d. (unpaired *t* test with Welch's  
643 correction, \**P* < 0.0001).

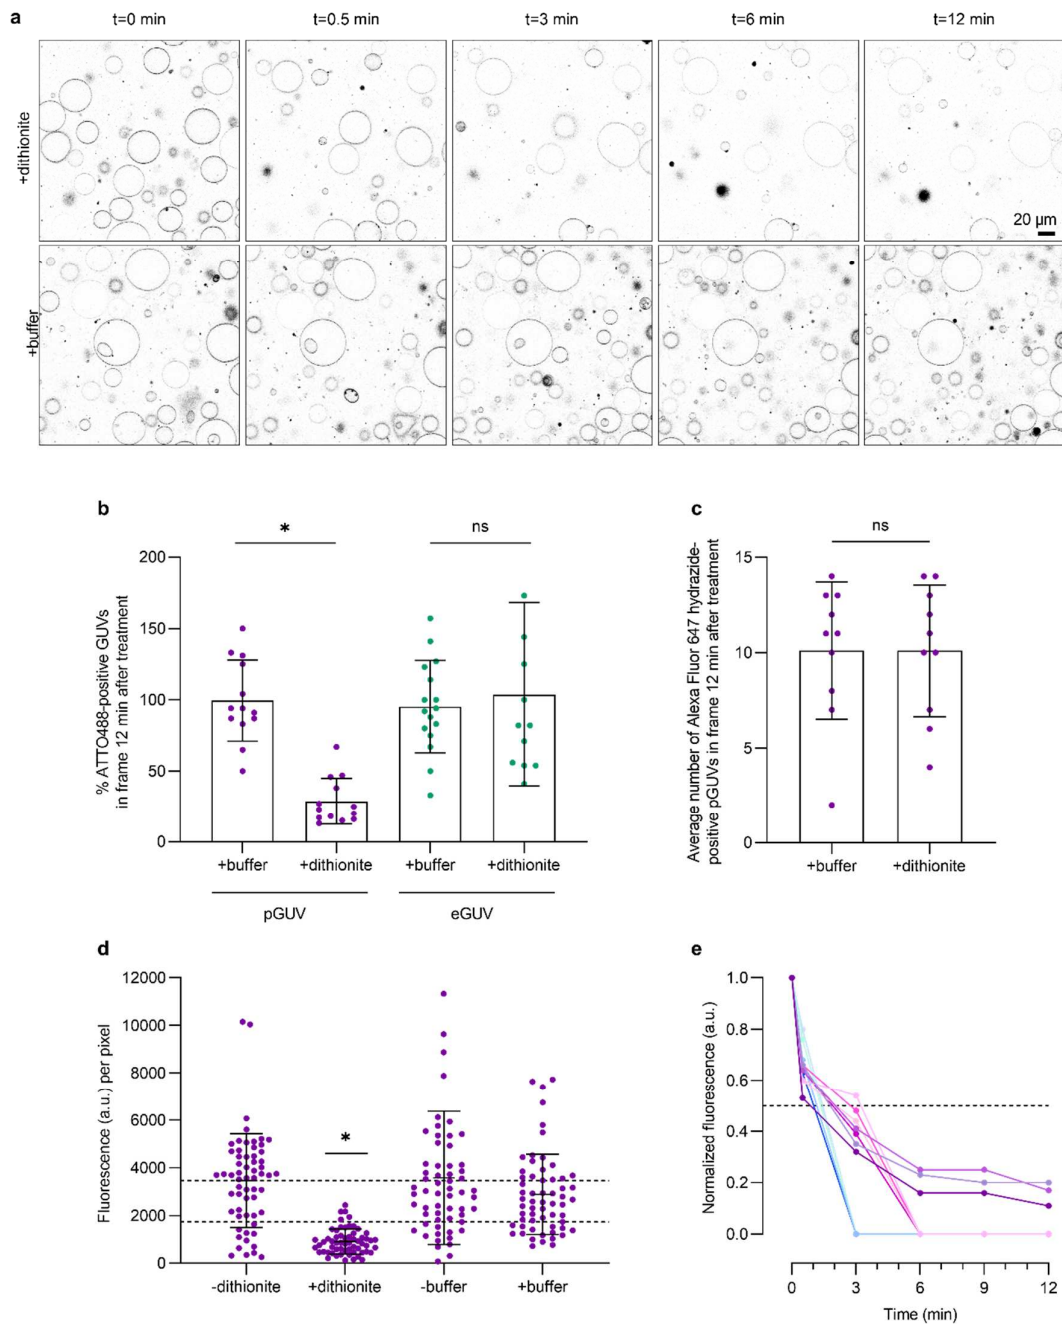

645

646 **Figure 6. Dithionite bleaching of ATTO488-PE in pGUVs.** (a) Confocal time series of ATTO488-PE-  
 647 containing pGUVs before (t=0 min) and after (t=0.5, 3, 6, 12 min) addition of dithionite or buffer. (b)  
 648 Dot plot showing the percentage of ATTO488-PE-positive pGUVs and eGUVs in more than ten fields of  
 649 view at t=12 min, compared with the value at t=0 min in the same field. (c) Dot plot showing the  
 650 average number per imaged field of Alexa Fluor 647 hydrazine (luminal marker)-positive pGUVs and  
 651 eGUVs after 12 min treatment with dithionite or buffer. (d) Dot plot of ATTO488-PE fluorescence of

652 individual pGUVs within the field of view before and 12 min after dithionite or buffer treatment  
653 (purple dots, n=60). Black lines indicate mean  $\pm$  s.d. (one-way ANOVA and Tukey test,  $*P < 0.0001$ ).  
654 Dashed lines are provided as a guide to indicate 100% and 50% levels of fluorescence based on the  
655 mean value at t=0 min. (e) Dithionite reduction of ATTO488-PE fluorescence of eleven individually  
656 tracked pGUVs (coded in different colors), normalized to the fluorescence value at t=0 min. The  
657 arrowhead indicates dithionite addition. The horizontal dashed line corresponds to 50% loss of  
658 fluorescence. Four of the traces show complete loss of fluorescence by t=3 min, four show complete  
659 loss of fluorescence by t=6 min, and three show detectable fluorescence at t=12 min.



660

Supplementary figure S1

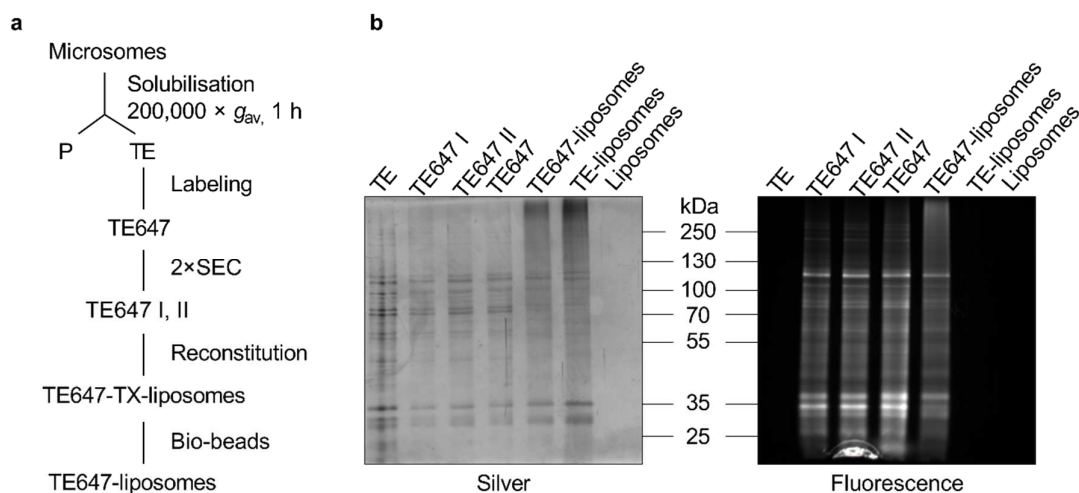

661

662 **Supplementary figure S1. Preparation of fluorescently labeled endoplasmic reticulum (ER)**

663 **membrane proteins and reconstitution into large unilamellar liposomes. (a)** Experimental workflow.

664 ER membrane proteins were selectively solubilized from yeast microsomes with Triton X-100 to

665 generate a 'Triton Extract' (TE). TE was fluorescently labeled (TE647) with Alexa Fluor 647 NHS ester,

666 excess fluorophore was removed via two rounds of size-exclusion chromatography (SEC) (yielding

667 TE647 I and subsequently TE647 II), and the resulting labeled proteins were reconstituted together

668 with egg PC, ATTO488-PE, and Biotinyl-PE into liposomes (TX-liposomes) using Bio-beads SM2 to

669 remove detergent. Proteoliposomes were also generated with unlabeled TE and protein-free

670 liposomes were generated in parallel. **(b)** SDS-PAGE analysis of samples from different steps during

671 proteoliposome reconstitution. The gel was visualized by silver staining (left) and fluorescence scan of

672 Alexa Fluor 647 (right).

673

674

### Supplementary figure S2

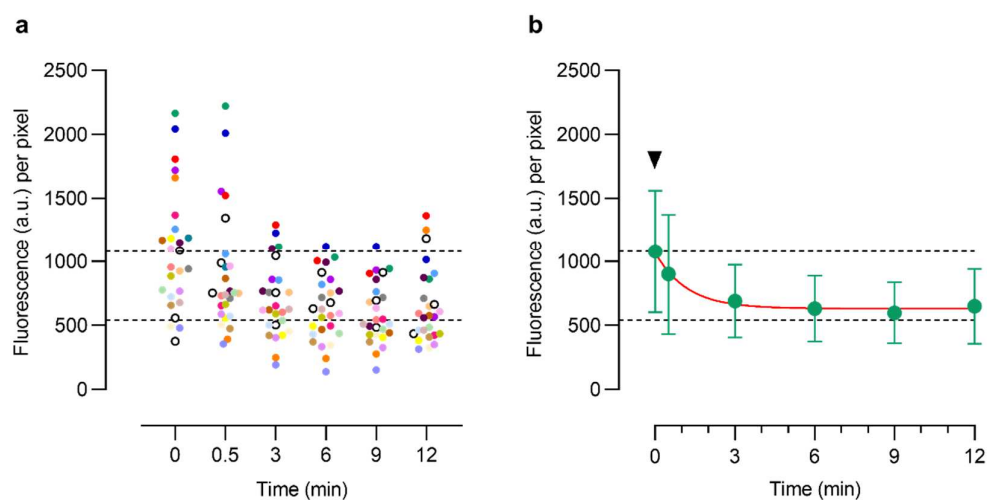

675

676 **Supplementary figure S2. Dithionite bleaching of ATTO488-PE in empty GUVs.** (a) Dot plot of  
677 ATTO488-PE fluorescence intensities of individual eGUVs (each eGUV is uniquely color coded, n=26)  
678 before (t=0 min) and after dithionite addition (t=0.5, 3, 6, 9 and 12 min). Black open circles indicate  
679 three eGUVs that did not react to dithionite. Dashed lines indicate 100% and 50% levels of  
680 fluorescence based on the mean value at t=0. (b) Time course of the loss of average ATTO488-PE  
681 fluorescence intensity of eGUVs upon addition of dithionite (arrowhead). Data are compiled from  
682 panel a and presented as mean  $\pm$  s.d. (n=26). The red line represents a monoexponential fit of the data  
683 ( $t_{1/2} = 0.82$  min). Dashed lines indicate 100% and 50% levels of fluorescence based on the mean value  
684 at t=0 min.
